# Supplementary material
Source: HighWire-hosted journal article supplement (http://www.cmaj.ca/highwire/filestream/59790/field_highwire_adjunct_files/0/151027-res-1-at.pdf)
Supplement: 151027-res-1-at.pdf [file 151027-res-1-at.pdf]

**Appendix 1 (as supplied by the authors):** Additional characteristics of the study population

| Characteristic         | TOTAL SAMPLE   |                            | Provinces and time periods with pharmacist policies |                            | Provinces and time periods with no pharmacist policies |                            |
|------------------------|----------------|----------------------------|-----------------------------------------------------|----------------------------|--------------------------------------------------------|----------------------------|
|                        | N (%)          | Influenza Immunization (%) | N (%)                                               | Influenza Immunization (%) | N (%)                                                  | Influenza Immunization (%) |
| Weighted sample, no.   | 481,526 (100)  | 28.8                       | 134,250 (27.9)                                      | 30.4                       | 347,276 (72.1)                                         | 28.2                       |
| Place of residence     |                |                            |                                                     |                            |                                                        |                            |
| Urban                  | 394,572 (81.9) | 28.9                       | 114,194 (85.0)                                      | 30.4                       | 280,378 (80.7)                                         | 28.3                       |
| Rural                  | 86,954 (18.1)  | 28.0                       | 20,056 (14.9)                                       | 30.2                       | 66,898 (19.3)                                          | 27.4                       |
| Income quartile        |                |                            |                                                     |                            |                                                        |                            |
| Lowest                 | 26,762 (5.6)   | 26.77                      | 6,996 (5.3)                                         | 28.0                       | 19,766 (5.8)                                           | 26.4                       |
| Lower-middle           | 67,394 (14.2)  | 32.01                      | 18,533 (14.0)                                       | 33.6                       | 48,861 (14.6)                                          | 31.4                       |
| Upper-middle           | 130,657 (27.5) | 29.54                      | 35,650 (27.0)                                       | 32.2                       | 95,007 (27.7)                                          | 28.9                       |
| Highest                | 210,084 (44.2) | 27.44                      | 67,273 (50.9)                                       | 27.3                       | 142,811 (41.6)                                         | 26.6                       |
| Not stated             | 40,752 (8.6)   | 30                         | 3,719 (2.8)                                         | 28.6                       | 37,034 (10.8)                                          | 30.1                       |
| Educational attainment |                |                            |                                                     |                            |                                                        |                            |
| Some secondary         | 94,663 (19.7)  | 31.8                       | 23,336 (17.4)                                       | 32.7                       | 71,327 (20.5)                                          | 31.5                       |
| Secondary              | 78,741 (16.4)  | 26.9                       | 25,703 (19.2)                                       | 27.6                       | 53,038 (15.3)                                          | 26.6                       |
| Some post-secondary    | 33,641 (7.0)   | 22.2                       | 7,788 (5.8)                                         | 23.0                       | 25,853 (7.4)                                           | 21.9                       |
| Post-secondary         | 261,679 (54.3) | 29.0                       | 74,537 (55.5)                                       | 31.3                       | 187,142 (53.9)                                         | 28.0                       |
| Not stated             | 12801 (2.7)    | 30.8                       | 2,885 (2.2)                                         | 32.0                       | 9,916 (2.9)                                            | 30.5                       |

| Marital status                        |                |      |               |      |                |      |
|---------------------------------------|----------------|------|---------------|------|----------------|------|
| Single                                | 141,648 (29.5) | 19.1 | 39,318 (29.4) | 20.5 | 102,329 (29.5) | 18.6 |
| Separated/widowed/divorced            | 58,458 (12.2)  | 40.1 | 15,886 (11.9) | 41.5 | 42,572 (12.3)  | 39.6 |
| Married/common-law                    | 280,550 (58.4) | 31.3 | 78,647 (58.8) | 33.1 | 201,903 (58.2) | 30.6 |
| Immigration status                    |                |      |               |      |                |      |
| Canadian-born                         | 359,698 (76.9) | 28.2 | 94,269 (72.3) | 29.7 | 265,439 (78.9) | 27.7 |
| Long-term resident ( $\geq 11$ years) | 76,807 (16.4)  | 34.3 | 25,954 (19.9) | 36.3 | 50,853 (15.07) | 33.3 |
| Recent immigrant (<10 years)          | 31,358 (6.7)   | 21.1 | 10,195 (7.8)  | 21.4 | 21,163 (6.3)   | 21.0 |
| Racial or cultural group              |                |      |               |      |                |      |
| White                                 | 367,015 (76.2) | 29.2 | 95,533 (71.2) | 31.2 | 271,482 (78.2) | 28.6 |
| Black                                 | 11,642 (2.4)   | 23.7 | 2,795 (2.1)   | 25.9 | 8,847 (2.6)    | 23.0 |
| Korean                                | 2,028 (0.4)    | 27.7 | 907 (0.7)     | 26.8 | 1,122 (0.3)    | 28.4 |
| Filipino                              | 7,858 (1.6)    | 34.7 | 3,367 (2.5)   | 34.4 | 4,491 (1.3)    | 34.9 |
| Japanese                              | 982 (0.2)      | 38.9 | 470 (0.4)     | 41.4 | 512 (0.2)      | 36.7 |
| Chinese                               | 16,511 (3.4)   | 30.2 | 7,292 (5.4)   | 29.1 | 9,219 (2.7)    | 31.0 |
| South Asian                           | 18,348 (3.8)   | 29.2 | 7,099 (5.3)   | 30.5 | 11,249 (3.2)   | 28.4 |
| Southeast Asian                       | 4,483 (0.9)    | 30.7 | 1,523 (1.1)   | 35.3 | 2,960 (0.9)    | 28.4 |
| Arab                                  | 4,696 (1.0)    | 16.0 | 863 (0.6)     | 18.6 | 3,833 (1.1)    | 15.5 |
| West Asian                            | 3,024 (0.6)    | 22.5 | 959 (0.7)     | 23.2 | 2,065 (0.6)    | 22.1 |
| Latin American                        | 6,091 (1.3)    | 20.6 | 1,693 (1.3)   | 21.8 | 4,398 (1.3)    | 20.2 |
| Aboriginal                            | 16,243 (3.4)   | 25.1 | 5,033 (3.8)   | 22.8 | 11,210 (3.2)   | 26.2 |
| Multiple                              | 5,355 (1.1)    | 24.1 | 2,085 (1.6)   | 25.0 | 3,269 (0.9)    | 23.5 |
| Other                                 | 3,220 (0.7)    | 22.9 | 1,206 (0.9)   | 26.2 | 2,014 (0.6)    | 21.0 |
| Not stated                            | 14,029 (2.9)   | 30.6 | 3,422 (2.6)   | 33.0 | 10,607 (3.1)   | 29.8 |

---

|                                     |                |       |                |      |                |      |
|-------------------------------------|----------------|-------|----------------|------|----------------|------|
| Self-reported health status         |                |       |                |      |                |      |
| Poor                                | 11,953 (2.5)   | 46.4  | 3,525 (2.6)    | 46.7 | 8,428 (2.4)    | 46.3 |
| Fair                                | 39,835 (8.3)   | 40.7  | 10,929 (8.2)   | 40.5 | 28,907 (8.3)   | 40.8 |
| Good/very good/excellent            | 429,254 (89.2) | 27.2  | 119,651 (89.2) | 29.0 | 309,602 (89.2) | 26.5 |
| Body mass index category            |                |       |                |      |                |      |
| Normal/underweight ( $\leq 24.9$ )  | 232,362 (48.7) | 26.06 | 64,951 (48.9)  | 27.7 | 167,411 (48.7) | 25.4 |
| Overweight (25.0-29.9)              | 151,180 (31.7) | 30.62 | 41,559 (31.3)  | 32.3 | 109,622 (31.9) | 30.0 |
| Obese ( $\geq 30.0$ )               | 79,673 (16.7)  | 33.32 | 22,138 (16.7)  | 34.6 | 57,536 (16.7)  | 32.8 |
| Not stated                          | 13,647 (2.9)   | 30.47 | 4,272 (3.2)    | 32.3 | 9,374 (2.7)    | 29.6 |
| Child <5 years of age in household  | 62,936 (13.1)  | 22.69 | 17,984 (13.4)  | 26.0 | 44,952 (12.9)  | 21.4 |
| Smoking                             |                |       |                |      |                |      |
| Never                               | 201,770 (42.1) | 28.6  | 60,467 (45.3)  | 30.1 | 141,304 (40.9) | 27.9 |
| Former                              | 179,554 (37.5) | 33.7  | 48,577 (36.4)  | 35.5 | 130,977 (37.9) | 33.0 |
| Daily/occasional                    | 97,935 (20.4)  | 20.1  | 24,486 (18.3)  | 21.1 | 73,449 (21.2)  | 19.8 |
| Had pandemic A/H1N1 vaccine in 2009 |                |       |                |      |                |      |
| Yes                                 | 26,534 (5.51)  | 44.8  | 5,791 (4.3)    | 61.7 | 20,743 (6.0)   | 40.1 |
| No                                  | 35,168 (7.3)   | 8.5   | 9,393 (7.0)    | 7.7  | 25,775 (7.4)   | 8.7  |
| Not applicable                      | 419,645 (87.2) | 29.5  | 119,035 (88.7) | 30.6 | 300,610 (86.6) | 29.0 |

---
